# Supplementary material
Source: publisher site journal article supplement (https://www.dovepress.com/article/312989)
Supplement: Supplementary file 1 [file get_supplementary_file.php]

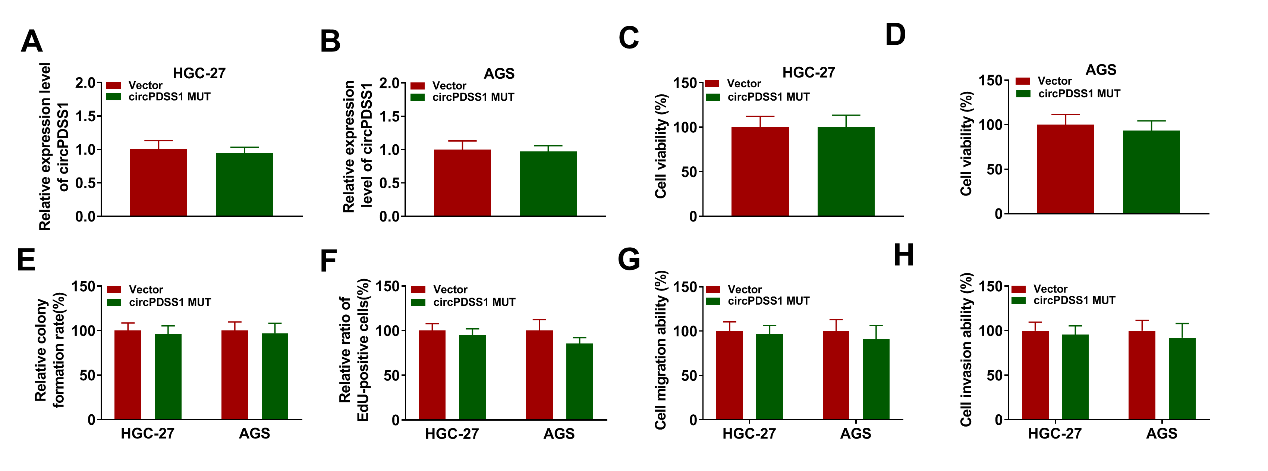


**Supplementary Figure 1.** **Overexpressing of circPDSS1 MUT could not affect GC cell progression.** GC-27 and AGS cells were transfected with circPDSS1 or vector. (A and B) The expression of circPDSS1 was measured by qRT-PCR. (C-F) Cell proliferation ability was evaluated using CCK-8 assay, colony formation assay, and EdU assay. (G and H) Cell migration and invasion were detected by transwell assay.


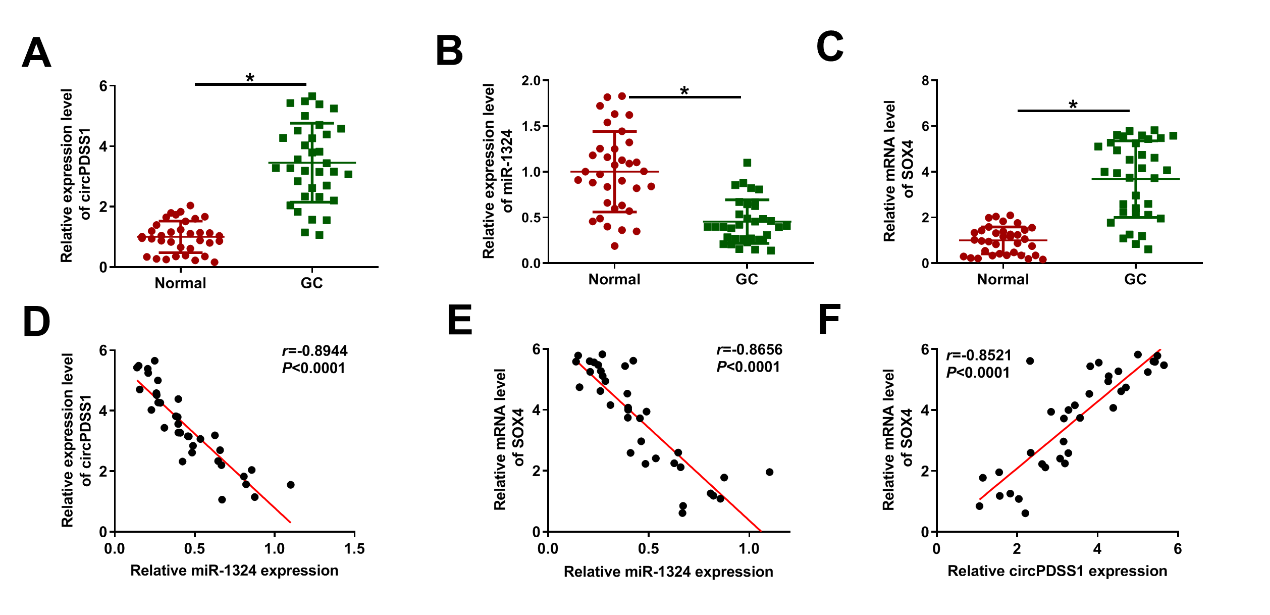


**Supplementary Figure 2. The relationships among** **circPDSS1, miR-1324 and SOX4 in GC tissues.** (A-C) The levels of circPDSS1 miR-1324 and SOX4 mRNA in GC tissues were measured by qRT-PCR. (D-F) The correlations among circPDSS1, miR-1324 and SOX4 in GC tissues were analyzed by spearman’s correlation coefficient analysis. **P*<0.05.
